# Supplementary material for: Attainment of Sexual Maturity and Gonadotropin Priming in Gilts Determine Follicular Development, Endocrine Milieu and Response to Ovulatory Triggers
Source: MDPI journal article supplement (doi:10.3390/ijms23169190), 2022-08-16
Supplement: s1 [file s1]

## Supplementary Tables and Figures

Supplementary Table S1. List of antibodies used in study.

| Peptide/Protein Target                  | Name of Antibody                                       | Catalog No.,<br>Name of Source              | Species Raised in<br>Monoclonal or<br>Polyclonal | Dilution<br>used |
|-----------------------------------------|--------------------------------------------------------|---------------------------------------------|--------------------------------------------------|------------------|
| <b>Prostaglandin assays</b>             |                                                        |                                             |                                                  |                  |
| PGE <sub>2</sub>                        | Anti-Prostaglandin E <sub>2</sub><br>Antibody          | P5164<br>Sigma-Aldrich                      | Rabbit, polyclonal                               | 1:200            |
| PGFM                                    | Anti-PGFM serum                                        | WS4468-7<br>donated by<br>Dr William Silvia | Rabbit, polyclonal                               | 1:10000          |
| <b>Western blot</b>                     |                                                        |                                             |                                                  |                  |
| CYP17A1                                 | Anti- CYP17A1 Antibody                                 | ab125022<br>Abcam                           | Rabbit, monoclonal                               | 1:1000           |
| CYP19A1                                 | Anti-CYP19A1 Antibody                                  | MCA2077S<br>Bio-Rad                         | Mouse, monoclonal                                | 1:250            |
| FSHR                                    | Anti-FSHR Antibody                                     | bs 0895R<br>Biossua                         | Rabbit, polyclonal                               | 1:400            |
| HSD3B1                                  | Anti- HSD3B1 Antibody                                  | ab55268<br>Abcam                            | Mouse, monoclonal                                | 1:100            |
| LHCGR                                   | Anti- LHCGR Antibody                                   | AD2716317<br>donated by<br>Dr Marco Banoni  | Mouse, monoclonal                                | 1:600            |
| PTGFS                                   | Anti- PTGFS Antibody                                   | AV48180<br>Sigma                            | Rabbit, polyclonal                               | 1:200            |
| STAR                                    | Anti-StAR Antibody                                     | ab96637<br>Abcam                            | Rabbit, polyclonal                               | 1:400            |
| GAPDH                                   | Anti- GAPDH Antibody                                   | MA5-15738<br>Thermo-Fisher Scientific       | Mouse, monoclonal                                | 1:2000           |
| Anti-rabbit,<br>secondary<br>antibodies | Immun-Star Goat Anti-<br>Rabbit (GAR)-HRP<br>Conjugate | 1705046<br>Bio-Rad                          | Goat, polyclonal                                 | 1:20000          |
| Anti-mouse,<br>secondary<br>antibodies  | Immun-Star Goat Anti-<br>Mouse (GAM)-HRP<br>Conjugate  | 1705047<br>Bio-Rad                          | Goat, polyclonal                                 | 1:20000          |

Supplementary Table S2. List of genes assayed in real-time PCR.

| Gene symbol    | Gene name                                                                       | Accession number | TaqMan Assays ID | Product length (bp) |
|----------------|---------------------------------------------------------------------------------|------------------|------------------|---------------------|
| <i>STAR</i>    | Steroidogenic Acute Regulatory Protein                                          | NM_213755.2      | Ss03381250_u1    | 73                  |
| <i>HSD3B1</i>  | Hydroxy-delta-5-steroid Dehydrogenase,<br>3 Beta- and Steroid Delta-isomerase 1 | NM_001004049.2   | Ss03391752_m1    | 72                  |
| <i>CYP17A1</i> | Cytochrome P450 Family 17 Subfamily A Member 1                                  | NM_214428.1      | Ss03394945_m1    | 61                  |
| <i>CYP19A1</i> | Cytochrome P450 Family 19 Subfamily A Member 1                                  | NM_214429.1      | Ss03384876_u1    | 72                  |
| <i>PTGES</i>   | Prostaglandin E Synthase                                                        | NM_001038631.1   | Ss03392129_m1    | 70                  |
| <i>LHCGR</i>   | Luteinizing Hormone/Choriogonadotropin Receptor                                 | NM_214449.1      | Ss03384991_u1    | 64                  |
| <i>FSHR</i>    | Follicle Stimulating Hormone Receptor                                           | NM_214386.3      | Ss03384581_u1    | 99                  |
| <i>ACTB</i> *  | Beta-Actin                                                                      | XM_003357928.4   | Ss03376081_u1    | 77                  |
| <i>GAPDH</i> * | Glyceraldehyde 3-phosphate Dehydrogenase                                        | NM_001206359.1   | Ss03375435_u1    | 75                  |
| <i>HPRT1</i> * | Hypoxanthine-guanine Phosphoribosyltransferase                                  | NM_001032376.2   | Ss03388274_m1    | 73                  |

\*Reference genes

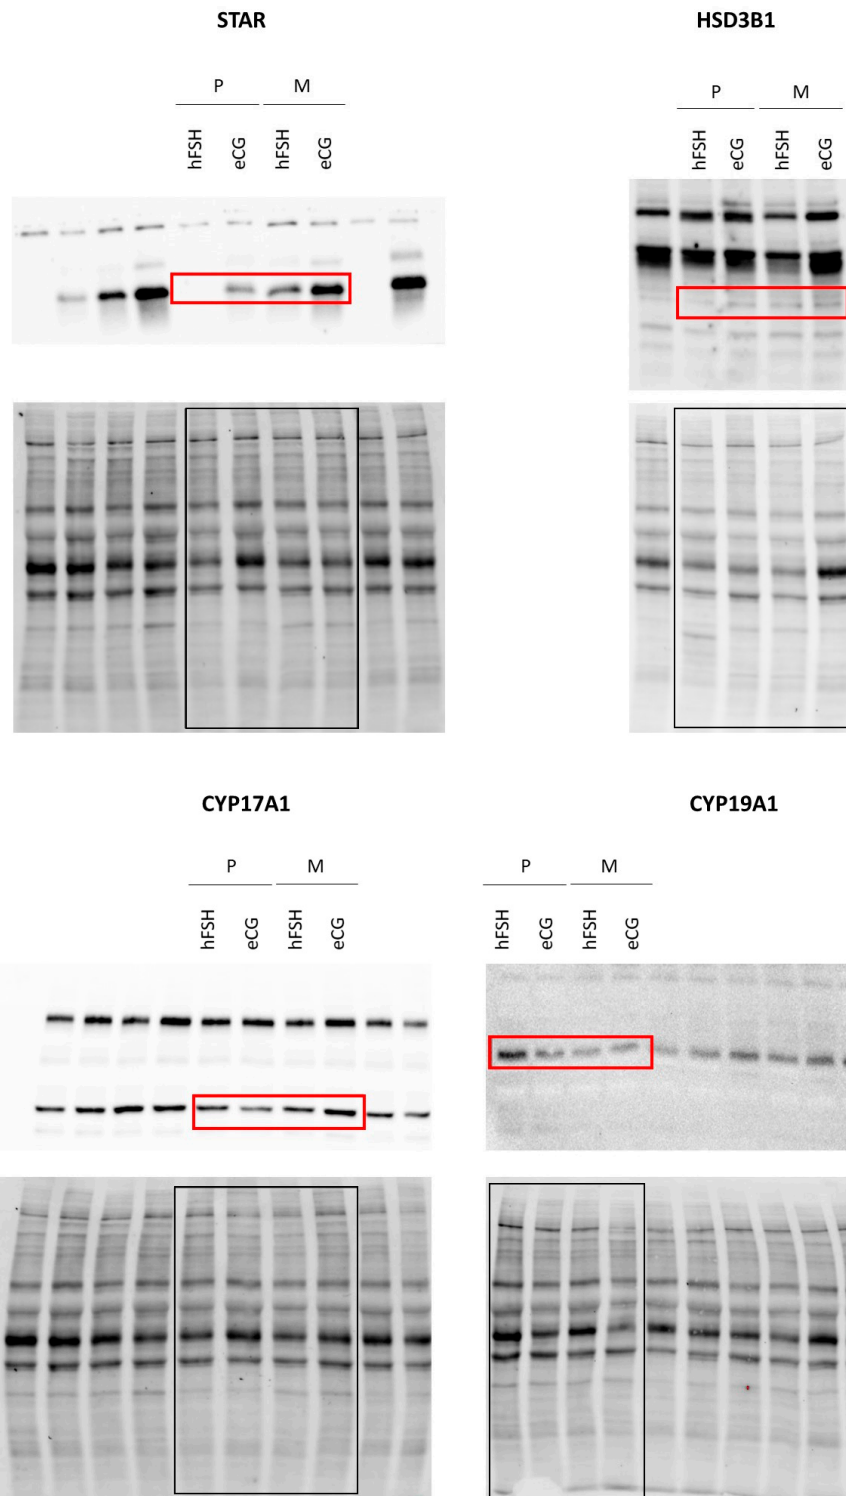

**Supplementary Figure S1. Uncropped blots for STAR, HSD3B1, CYP17A1, and CYP19A1 proteins in follicles collected from prepubertal and mature gilts challenged with hFSH or eCG.** In each upper panel, full blot showing STAR, HSD3B1, CYP17A1, and CYP19A1 protein expression are showed. Lower panels represent equivalent TGX Stain-Free gel showing total protein. Red boxes indicate areas presented in Figure 3. P – prepubertal, M – mature.

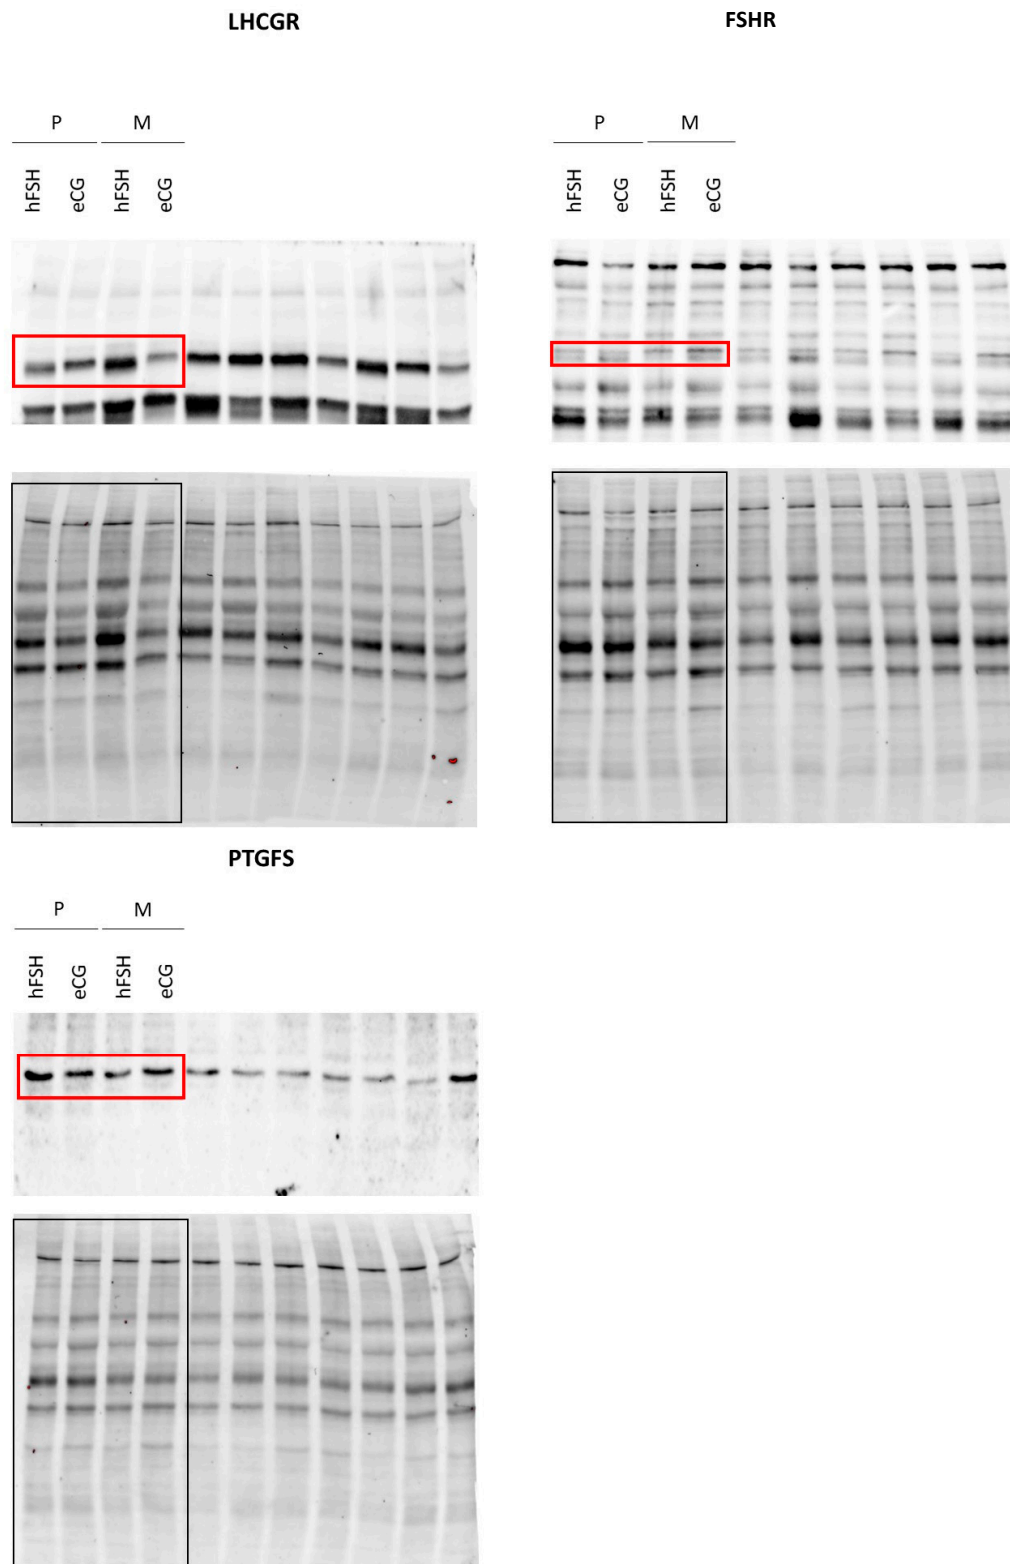

**Supplementary Figure S2. Uncropped blots for LHCGR, FSHR, and PTGFS proteins in follicles collected from prepubertal and mature gilts challenged with hFSH or eCG.** In each upper panel, full blot showing LHCGR, FSHR, and PTGFS protein expression are showed. Lower panels represent equivalent TGX Stain-Free gel showing total protein. Red boxes indicate areas presented in Figure 4. P – prepubertal, M – mature.

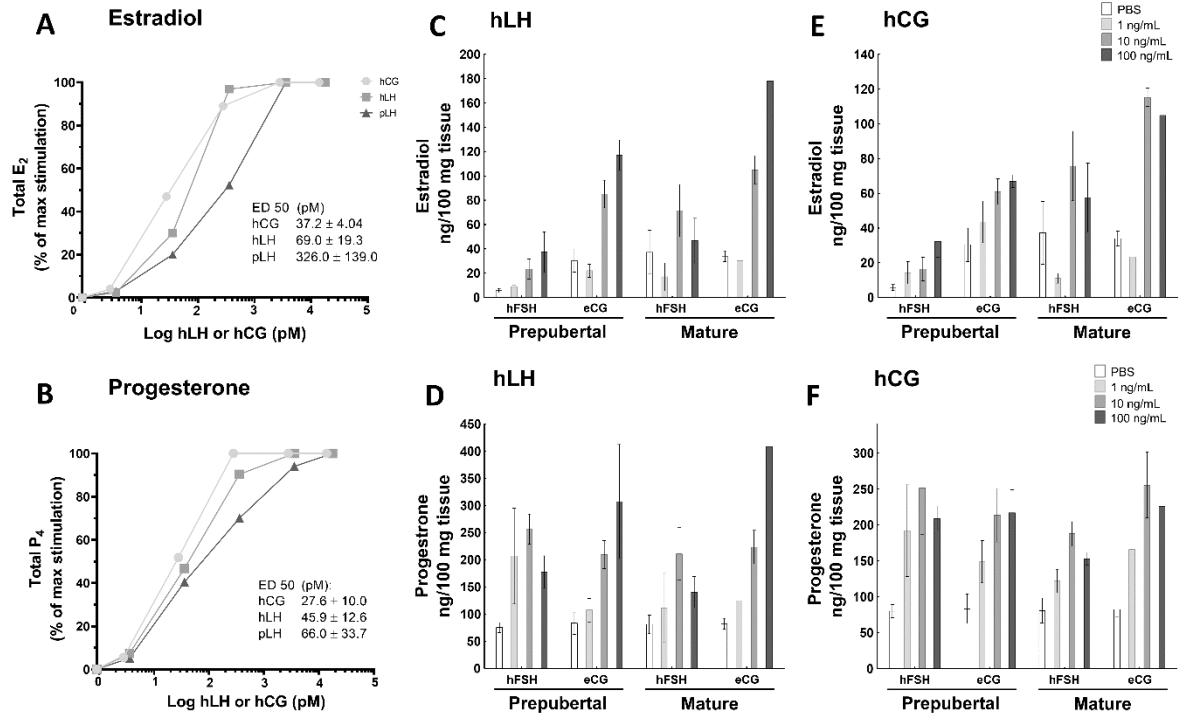

**Supplementary Figure S3. Dose-response experiment.** Stimulation of total E<sub>2</sub> (A) and P<sub>4</sub> (B) production by hLH and hCG. Preovulatory follicles were stimulated by increasing doses of hCG and LH. E<sub>2</sub> and P<sub>4</sub> levels were normalized as percentage of the maximal response. All the results are represented as Means ± SEM in a logarithmic X-axis, then non-linear regressions were plotted. Concentrations of E<sub>2</sub> (C, E) and P<sub>4</sub> (D, F) release in preovulatory follicles walls explants exposed to r-hLH or r-hCG (1 ng/mL, 10 ng/mL and 100 ng/mL) collected from prepubertal and mature gilts challenged with hFSH or eCG.
